# Supplementary material for: Assessing the utility of the Oxford Nanopore MinION for snake venom gland cDNA sequencing
Source: PeerJ journal article supplement (doi:10.7717/peerj.1441), 2015-11-24
Supplement: Supplementary_file_1.pdf [file Supplementary_file_1.pdf]

### Supplementary file 1: *de novo* error correction using Nanocorrect

Supplementary Table S1. Correction of pooled Eco6 nanopore sequence data using up to five rounds of correction using Nanocorrect [1]. Little improvement is seen after the second round, although the number of sequences is much reduced as a result of this process.

|                       | <b>Nanocorrect correction</b> |                          |                          |                          |                         |
|-----------------------|-------------------------------|--------------------------|--------------------------|--------------------------|-------------------------|
|                       | <b><u>Round 1</u></b>         | <b><u>Round 2</u></b>    | <b><u>Round 3</u></b>    | <b><u>Round 4</u></b>    | <b><u>Round 5</u></b>   |
| Alignment length (bp) | 9,948,507                     | 5,807,383                | 4,245,548                | 3,681,607                | 3,363,671               |
| Matches               | 9,623,049                     | 5,660,507                | 4,140,907                | 3,591,236                | 3,280,638               |
| Mismatches            | 98,888                        | 40,682                   | 31,202                   | 26,821                   | 25,011                  |
| Insertions            | 75,180                        | 26,494                   | 18,393                   | 15,983                   | 14,799                  |
| Deletions             | 226,570                       | 106,194                  | 73,439                   | 63,550                   | 58,022                  |
| Total Errors          | 400,638<br><b>(4.0%)</b>      | 173,370<br><b>(3.0%)</b> | 123,034<br><b>(2.9%)</b> | 106,354<br><b>(2.9%)</b> | 97,832<br><b>(2.9%)</b> |
